# Supplementary material for: Oryzias curvinotus in Sanya Does Not Contain the Male Sex-Determining Gene dmy
Source: MDPI journal article supplement (doi:10.3390/ani11051327), 2021-05-06
Supplement: s1 [file s1]

**GQ Female**

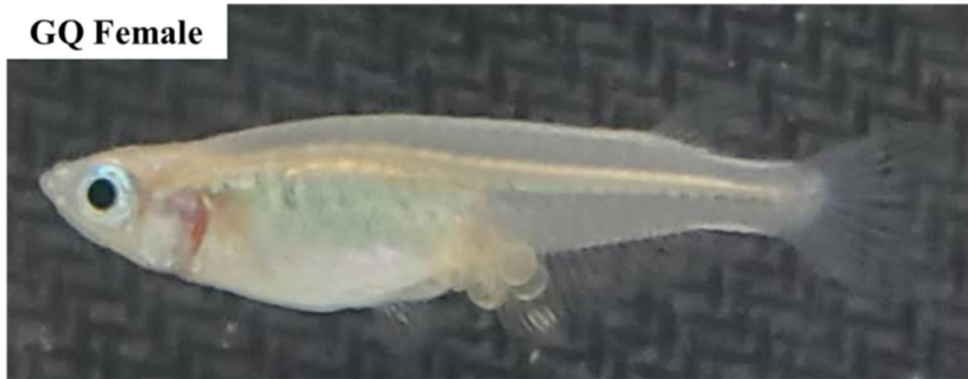

**SY Female**

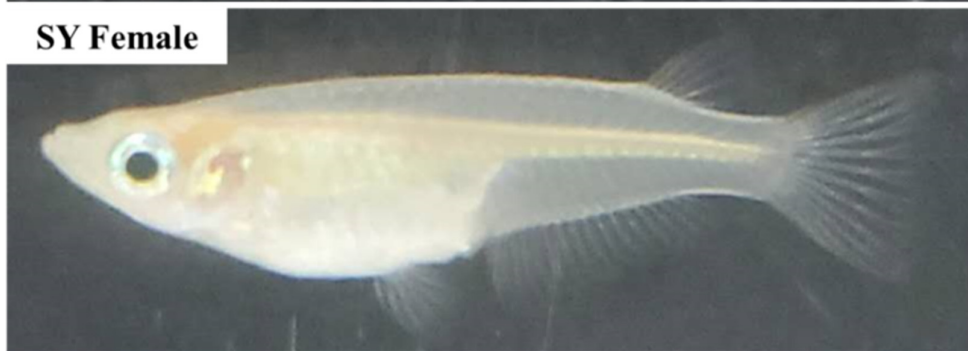

**GQ Male**

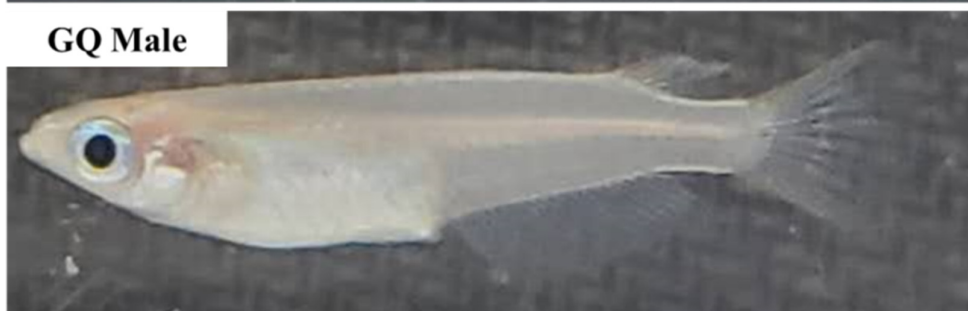

**SY Male**

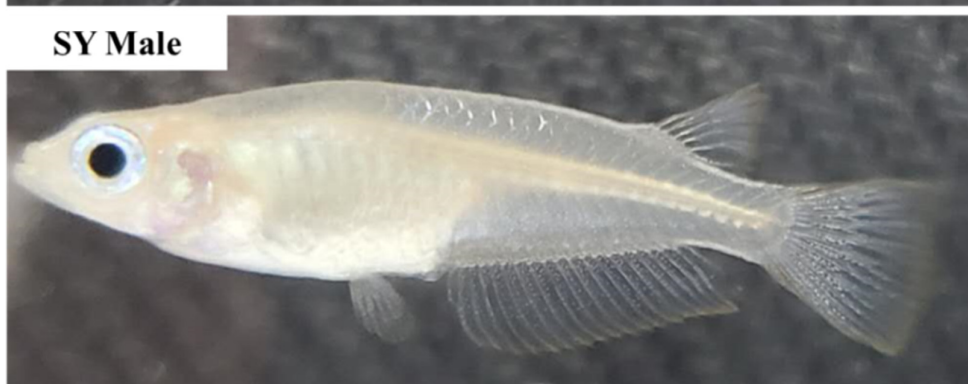

**Figure S1.** *O. curvinotus* form Gaoqiao and Sanya

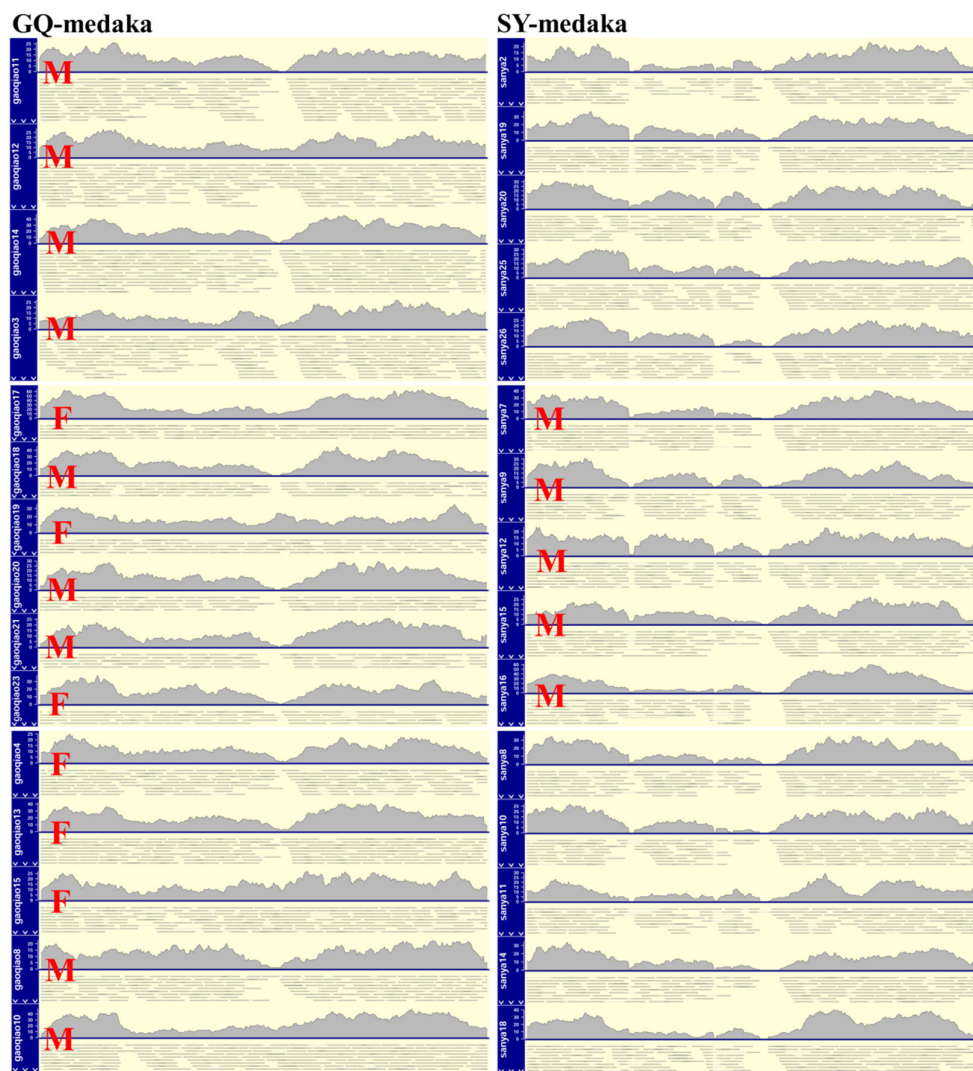

**Figure S2.** Coverage of *dmrt1* by whole genome re-sequencing reads of GQ-medaka and SY-medaka. M indicates males and F indicates females.

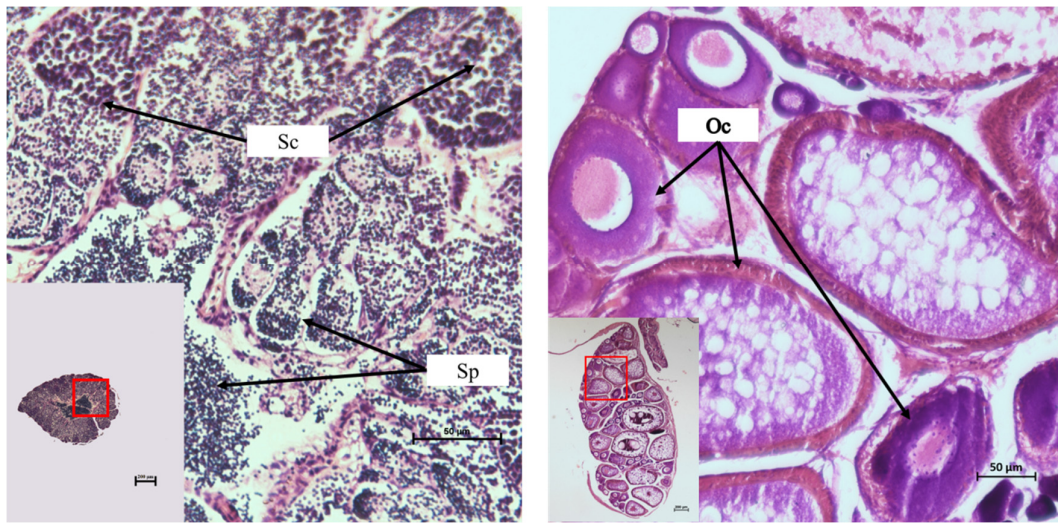

**Figure S3.** Histological section of testis and ovary of SY-medaka. SC, spermatocytes Sp, spermatids; OC, oocytes.

Species distribution

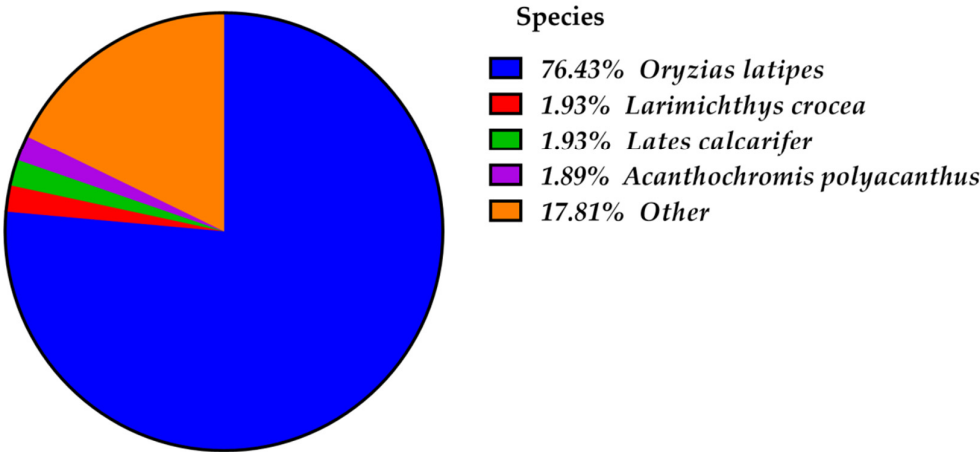

Figure S4. Distribution of homologous species of SY-medaka unigenes

**Table S1.** The sequences of primers used in this study

| Primer name         | Sequence 5'-3'                                         | purpose                   |
|---------------------|--------------------------------------------------------|---------------------------|
| Co1-F               | TCAACCAACCACAAAGACAATGGCAC                             | Species identification    |
| Co1-R               | TAGACTTCTGGGTGGCCAAAGAATCA                             |                           |
| Ocsex-F             | ATGGTAACGCAGCCTTTCC                                    | Genetic sex determination |
| Ocsex-R             | GCCACATTCTTCTCAGGCA                                    |                           |
| <i>cbpa1</i>        | F: CTTCACCACGAGCAATGTC, R: GGGAGTGTCCAGATTCAAAGTG      | qPCR                      |
| <i>odf3a</i>        | F: TCAGGGTGTAACCTGGTGCC, R: TCTTTGGCTGGGAGACTTCC       | qPCR                      |
| <i>cmbp4b</i>       | F: CGAAGACGCTACTCCTGATGTATC, R: CCTTTCTGTCCGCCTCAAAC   | qPCR                      |
| <i>saca4</i>        | F: TGTAACGAGGCACCTGAATCC, R: CACACACAGTCAAAGGCTTCTTC   | qPCR                      |
| <i>bmp15</i>        | F: CAAACTTCACTCCGTCACCC, R: GACAGTCTCCTTGGCAGTATCG     | qPCR                      |
| <i>h2a1a</i>        | F: TAGCACCACGCCACATCTTG, R: AGCAGCACCGTCTTCTTTTCG      | qPCR                      |
| <i>zp4</i>          | F: TCTTGGAGGTCAACCCTGTTC, R: TCTACACAACCCTTTGCGAGAC    | qPCR                      |
| <i>horn</i>         | F: CATCAGAAACCTACAGGACAATCC, R: TCATCGTCGTCGTCACCATC   | qPCR                      |
| <i>loc101162755</i> | F: GCTGAACCTTTGCCCTGATG, R: AGTGAGCGAGGAGGACCAAG       | qPCR                      |
| <i>dmrt1</i>        | F: CTTCAATTCTTACCACCACCTTC, R: CGGAGCGTCAGAGAGTCAT     | qPCR                      |
| <i>zglp1</i>        | CCCAGAGAAGAAGCCAAGTTC, R: ATGGTGGTCAGCATCGTCAG         | qPCR                      |
| <i>loc101175599</i> | F: TGTCAAACAAGAGAATGGGAGC, R: TCTGAAGTGGATGGAAGTGTAGC  | qPCR                      |
| <i>spc11</i>        | F: CATCAGGTCCATCAAGGCTTC, R: GAGGAGTGTGAAACCGTAGAGC    | qPCR                      |
| <i>nanos3</i>       | F: ACGGAGGTCAGTTTCGGATG, R: TAATGAACGGGTGAAGCGTG       | qPCR                      |
| <i>gsdf</i>         | F: TAGCCTATCTTGACGGACAGCC, R: GCTCTTCCCTTGATGGATGC     | qPCR                      |
| <i>insl5</i>        | F: GTCAGCCCGTCAACCAGAATC, R: CAAACATCTCACAGGAAAGGAGG   | qPCR                      |
| <i>cyp19a</i>       | F: CTCTTCTGGGTGTTCCTGTTG, R: TCTTGTGCCTCTGATGAATCC     | qPCR                      |
| <i>izumo1</i>       | F: GGTCTCAGCAGCAGGGATAAAG, R: AGGAAATCATCAGAACCCAGAGTG | qPCR                      |
| <i>mlf1</i>         | F: GCTTCAGACTCATCCAGGTTC, R: GCCACTACATCCAAGACAGAGG    | qPCR                      |
| <i>foxl2</i>        | F: TTCAAGACAGAAGCAGCAGTATTC, R: GCCGATGACACCTTTATCTCC  | qPCR                      |
| <i>ee1b</i>         | F: GATGATGACATTGACCTGTTTGG, R: GATGGAGGACTTGGCGATG     | qPCR                      |
| <i>rps4x</i>        | F: CGAAACACTGGATGCTGGATAAG, R: ACTTCAGGCGGTTCTCAGG     | qPCR                      |

**Table S2.** The COI sequencing results of 15 SY-medaka

| Name   | Sequence 5'-3'                                                                                                                                                                                                                                                                                                                                                                                                                                                                                                                                                                                                                                                                    |
|--------|-----------------------------------------------------------------------------------------------------------------------------------------------------------------------------------------------------------------------------------------------------------------------------------------------------------------------------------------------------------------------------------------------------------------------------------------------------------------------------------------------------------------------------------------------------------------------------------------------------------------------------------------------------------------------------------|
| COI_1# | AAAAATGTTGTATTAGGTTCCGATCTGTGAGAAGCATGGTGATACCTGCAGCTAGAACAGGAAGAGA<br>GAGTAGAAGTAATACTGCGGTAATTAGTACAGCCACACAAATAAAGGGGTTTGATATTGGGAAATGG<br>CTGGAGGTTTATATTAATAATAGTTGTGATGAAATTAATGGCCCTAGGATAGAAGAAATCCGGCCAG<br>GTGAAGAGAGAAAATGGTTAAATCTACGGAGGCCCTGCGTGTGCCAAATTACCTGACAAGGGGGGA<br>TATACGGTTCATCCTGTTCGGGCACCAGCTTCTACACCAGATGAGGCCAATAATAGAAGGAAAGAAAGG<br>GGGCAGGAGTCAAAAGCTTATATTATTTATCCGGGGGAAGGCCATGTCGGGGGCTCCAATCATTAAAG<br>GGATTAATCAGTTGCCAAACCCCCCAATTATGATTGGCATTACTATAAAGAAAATTATTACGAAAGCAT<br>GTGCAGTTACAATTACGTTATAGATCTGGTCGTCTCCTAATAGGGAGCCTGGTTGACTTAGTTCTGCCCC<br>AATGAGTAGACTTAAGGCCGTCCCTACCATTCCCGCCAGGCACCAAGATTAGATACAGGGTGCCAT<br>TGCTTTGTGGTT |
| COI_2# | TCCGATCTGTGAGAAGCATGGTGATACCTGCAGCTAGAACAGGAAGAGAGAGTAGAAGTAATACTGC<br>GGTAATTAGTACAGCCACACAAATAAAGGGGTTTGATATTGGGAAATGGCTGGAGGTTTATATTAAT<br>AATAGTTGTGATGAAATTAATGGCCCTAGGATAGAAGAAATCCGGCCAGGTGAAGAGAGAAAATGG<br>TTAAATCTACGGAGGCCCTGCGTGTGCCAAATTACCTGACAAGGGGGGATATACGGTTCATCCTGTTC<br>CGGCACCAGCTTCTACACCAGATGAGGCCAATAATAGAAGGAAAGAGGGGGCAGGAGTCAAAAGC<br>TTATATTATTTATCCGGGGGAAGGCCATGTCGGGGGCTCCAATCATTAAAGGGATTAATCAGTTGCCAA<br>ACCCCCCAATTATGATTGGCATTACTATAAAGAAAATTATTACGAAAGCATGTGCAGTTACAATTACGTT<br>ATAGATCTGGTCGTCTCCTAATAGGGAGCCTGGTTGACTTAGTTCTGCCGAATGAGTAGACTTAAGGC<br>CGTCCCTACCATT                                                                         |
| COI_3# | TTCCGATCTGTGAGAAGCATGGTGATACCTGCAGCTAGAACAGGAAGAGAGAGTAGAAGTAATACTGC<br>GGTAATTAGTACAGCCACACAAATAAAGGGGTTTGATATTGGGAAATGGCTGGAGGTTTATATTAAT<br>AATAGTTGTGATGAAATTAATGGCCCTAGGATAGAAGAAATCCGGCCAGGTGAAGAGAGAAAATGG<br>TTAAATCTACGGAGGCCCTGCGTGTGCCAAATTACCTGACAAGGGGGGATATACGGTTCATCCTGTTC<br>CGGCACCAGCTTCTACACCAGATGAGGCCAATAATAGAAGGAAAGAGGGGGCAGGAGTCAAAAGC<br>TTATATTATTTATCCGGGGGAAGGCCATGTCGGGGGCTCCAATCATTAAAGGGATTAATCAGTTGCCAA<br>ACCCCCCAATTATGATTGGCATTACTATAAAGAAAATTATTACGAAAGCATGTGCAGTTACAATTACGTT<br>ATAGATCTGGTCGTCTCCTAATAGGGAGCCTGGTTGACTTAGTTCTGCCGAATGAGTAGACTTAAGGC<br>CGTCCCTACCATTCCCGCCAGGCACCAAGATTAGATACAGGGTGCCATTGTCTT                               |
| COI_4# | AAGAGAGAGTAAAAGTAATACTGCGGTAATTAGTACAGCCACACAAATAAAGGGGTTTGATATTGGG<br>AAATGGCTGGAGGTTTATATTAATAATAGTTGTGATGAAATTAATGGCCCCAGGATAGAAGAAATTC<br>CGGCCAGGTGAAGAGAGAAAATGGTTAAATCTACGGAGGCCCTGCGTGTGCCAAATTACCTGACAA<br>GGGGGATATACGGTTCATCCTGTTCGGGCACCAGCTTCTACACCAGATGAGGCCAATAATAGAAGGA<br>AAGAAGGGGGCAGGAGTCAAAAGCTTATATTATTTATCCGGGGGAAGGCCATGTCGGGGGCTCCAATC<br>ATTAAAGGGATTAATCAGTTGCCAAACCCCCCAATTATGATTGGCATTACTATAAAGAAAATTATTACGA<br>AAGCATGTGCAGTTACAATTACGTTATAGATCTGGTCGTCTCCTAATAGGGAGCCTGGTTGACTTAGTTC<br>TGCCGAATGAGTAGACTTAAGGCCGTCCCTACCATTCCCG                                                                                                                   |
| COI_5# | AACAGGAAGAGAGAGTAGAAGTAATACTGCGGTAATTAGTACAGCTACACAAATAAAGGGGTTTGAT<br>ATTGGGAAATGGCTGGAGGTTTATATTAATAATAGTTGTGATGAAATTAATGGCCCTAGGATAGAAGA<br>AATTCCGGCCAGGTGAAGAGAGAAAATGGTTAAATCTACGGAGGCCCTGCGTGTGCCAAATTACCTG<br>ACAAGGGGGGATATACGGTTCATCCTGTCCCGGCACCAGCTTCTACACCAGATGAGGCCAATAATAGA<br>AGGAAAGAAGGGGGCAGGAGTCAAAAGCTTATATTATTTATCCGTGGGAAGGCCATGTCGGGGGCTCC<br>AATCATTAAAGGAATTAATCAGTTGCCAAACCCCCCAATTATGATTGGCATTACTATAAAGAAAATTATT<br>ACGAAAGCATGTGCAGTTACAATTACGTTATAGATCTGGTCGTCTCCTAATAGGGAGCCTGGTTGACTT<br>AGTTCTGCCGAATGAGTAGACTTAAGGCCGTCCCAACCATTCCCGCCAGGCACCAAGATTAGATA<br>CAGGGTGCCATTGCTTTGTGGTTTG                                                           |
| COI_6# | TGAGAAGCATGGTGATACCTGCAGCTAGAACAGGAAGAGAGAGTAGAAGTAATACTGCGGTAATTAGT<br>ACAGCCACACAAATAAAGGGGTTTGATATTGGGAAATGGCTGGAGGTTTATATTAATAATAGTTGTG<br>ATGAAATTAATGGCCCTAGGATAGAAGAAATCCGGCCAGGTGAAGAGAGAAAATGGTTAAATCTAC<br>GGAGGCCCTGCGTGTGCCAAATTACCTGACAAGGGGGGATATACGGTTCATCCTGTTCGGGCACCAG<br>CTTCTACACCAGATGAGGCCAATAATAGAAGGAAAGAGGGGGCAGGAGTCAAAAGCTTATATTATTT<br>ATCCGGGGGAAGGCCATGTCGGGGGCTCCAATCATTAAAGGGATTAATCAGTTGCCAAACCCCCCAAT<br>TATGATTGGCATTACTATAAAGAAAATTATTACGAAAGCATGTGCAGTTACAATTACGTTATAGATCTGG<br>TCGTCTCCTAATAGGGAGCCTGGTTGACTTAGTTCTGCCGAATGAGTAGACTTAAGGCCGTCCCTACC<br>ATTCCCGCCAGGCACCAAGATTAGATACAGG                                                      |
| COI_7# | AGGAAGAGAGAGTAGAAGTAATACTGCGGTAATTAGTACAGCCACACAAATAAAGGGGTTTGATAIT                                                                                                                                                                                                                                                                                                                                                                                                                                                                                                                                                                                                               |

|         |                                                                                                                                                                                                                                                                                                                                                                                                                                                                                                                                                                                                                                                                                |
|---------|--------------------------------------------------------------------------------------------------------------------------------------------------------------------------------------------------------------------------------------------------------------------------------------------------------------------------------------------------------------------------------------------------------------------------------------------------------------------------------------------------------------------------------------------------------------------------------------------------------------------------------------------------------------------------------|
|         | GGGAAATGGCTGGAGGTTTATATTAATAATAGTTGTGATGAAATTAATGGCCCCAGGATAGAAGAAA<br>TTCCGGCCAGGTGAAGAGAGAAAAATGGTTAAATCTACGGAGGCCCTGCGTGTGCCAAATTACCTGAC<br>AAGGGGGGATATACGGTTCATCCTGTTCGGCACCAGCTTCTACACCAGATGAGGCCAATAATAGAAG<br>GAAAGAAGGGGGCAGGAGTCAAAAGCTTATATTATTTATCCGGGGGAAGGCCATGTCGGGGGCTCCAA<br>TCATTAAGGGGATTAATCAGTTGCCAAACCCCCAATTATGATTGGCATTACTATAAAGAAAATTATTAC<br>GAAAGCATGTGCAGTTACAATTACGTTATAGATCTGGTCGTCTCCTAATAGGGAGCCTGGTTGACTTAGT<br>TCTGCCCGAATGAGTAGACTTAAGGCCGTCCCTACCATTCCCGCCCAGGCACCAAAGA                                                                                                                                                                    |
| COI_8#  | TAGGTTCCGATCTGTGAGAAGCATGGTGATACCTGCAGCTAGAACAGGAAGAGAGAGTGAAGTAATA<br>CTGCGGTAATTAGTACAGCCACACAAATAAAGGGGTTTGATATTGGGAAATGGCTGGAGGTTTATAT<br>TAATAATAGTTGTGATGAAATTAATGGCCCTAGGATAGAAGAAATTCCGGCCAGGTGAAGAGAGAAA<br>ATGGTTAAATCTACGGAGGCCCTGCGTGTGCCAAATTACCTGACAAGGGGGGATATACGGTTCATCCT<br>GTTCGGCACCAGCTTCTACACCAGATGAGGCCAATAATAGAAGGAAAGAAGGGGGCAGGAGTCAAA<br>AGCTTATATTATTTATCCGGGGGAAGGCCATGTCGGGGGCTCCAATCATTAAAGGGATTAATCAGTTGCC<br>AAACCCCCAATTATGATTGGCATTACTATAAAGAAAATTATTACGAAAGCATGTGCAGTTACAATTAC<br>GTTATAGATCTGGTCGTCTCCTAATAGGGAGCCTGGTTGACTTAGTCTGCCCGAATGAGTAGACTTAAG<br>GCCGTCCCTACCATTCCCGCCCAGGCACCAA                                                  |
| COI_9#  | GGTCGAAAAATGTTGTATTTAGGTTCCGATCTGTGAGAAGCATGGTGATACCTGCAGCTAGAACAGGA<br>AGAGAGAGTAGAAGTAATACTGCGTAATTAGTACAGCCACACAAATAAAGGGGTTTGATATTGGGA<br>AATGGCTGGAGGTTTATATTAATAATAGTTGTGATGAAATTAATGGCCCTAGGATAGAAGAAATCCG<br>GCCAGGTGAAGAGAGAAAAATGGTTAAATCTACGGAGGCCCTGCGTGTGCCAAATTACCTGACAAGG<br>GGGGATATACGGTTCATCCTGTTCGGCACCAGCTTCTACACCAGATGAGGCCAATAATAGAAGGAAA<br>GAAGGGGGCAGGAGTCAAAAGCTTATATTATTTATCCGGGGGAAGGCCATGTCGGGGGCTCCAATCAT<br>TAAAGGGATTAATCAGTTGCCAAACCCCCAATTATGATTGGCATTACTATAAAGAAAATTATTACGAA<br>AGCATGTGCAGTTACAATTACGTTATAGATCTGGTCGTCTCCTAATAGGGAGCCTGGTTGACTTAGTTCT<br>GCCCGAATGAGTAGACTTAAGGCCGTCCCTACCATTCCCGCCCAGGCACCAAAGATTAGATACAGGGT<br>GCCATTGTC |
| COI_10# | GGTCGAAAAATGTTGTATTTAGGTTCCGATCTGTGAGAAGCATGGTGATACCTGCAGCTAGAACAGGA<br>AGAGAGAGTAGAAGTAATACTGCGTAATTAGTACAGCCACACAAATAAAGGGGTTTGATATTGGGA<br>AATGGCTGGAGGTTTATGTTAATAATAGTTGTGATGAAATTAATGGCCCTAGGATGGAAGAAATTC<br>GGCCAGGTGAAGAGAGAAAAATGGTTAAATCTACGGAGGCCCTGCGTGTGCCAAATTACCTGACAAG<br>GGGGATATACGGTTCATCCTGTTCGGCACCAGCTTCTACACCAGATGAGGCCAATAATAGAAGGAA<br>AGAAGGGGGCAGGAGTCAAAAGCTTATATTATTTATCCGTGGGAAGGCCATGTCGGGGGCTCCAATCA<br>TTAAAGGGATTAATCAGTTGCCAAACCCCCAATTATGATTGGCATTACTATAAAGAAAATTATTACGA<br>AAGCATGTGCAGTTACAATTACGTTATAGATCTGGTCGTCTCCTAATAGGGAGCCTGGTTGACTTAGTTC<br>TGCCCGAATGAGTAGACTTAAGGCCGTCCCTACCATTCCCGCCCAGGCACCAAAGATTAGATACAGGG<br>TG          |
| COI_11# | CGAAAAATGTTGTATTTAGGTTTCGATCTGTGAGAAGCATGGTGATACCTGCAGCTAGAACAGGAAGG<br>GAGAGTAGAAGTAATACTGCGTAATTAGTACAGCTCACACAAATAAAGGGGTTTGATATTGGGAAAT<br>GGCTGGGGGTTTATGTTAATAATAGTTGTGATGAAATTAATGGCCCTAGGATAGAAGAAATCCGGC<br>CAGGTGAAGAGAGAAAAATGGTTAAATCTACGGAGGCCCTGCGTGTGCCAAATTACCTGACAAGGGG<br>GGATATACGGTTCATCCTGTTCGGCACCAGCTTCTACACCAGATGAGGCCAATAAAGAAGGAAAGA<br>AGGGGGCAGGAGTCAAAAGCTTATATTATTTATCCGTGGGAAGGCCATGTCGGGGGCTCCAATCATTAA<br>AGGAATTAATCAGTTGCCAAACCCCCAATTATGATTGGCATTACTATAAAGAAAATTATTACGAAAGC<br>ATGTGCAGTTACAATTACGTTATAGATCTGGTCGTCTCCTAATAGGGAGCCTGGTTGACTTAGTTCTGCC<br>CGAATGAGTAGACTTAAGGCCGTCCCTACCATTCCCGCCCAGGCACCAAAGA                              |
| COI_12# | GGGTCGAAAAATGTTGTATTTAGGTTTCGATCTGTGAGAAGCATAGTGATACCTGCAGCTAGAACAGG<br>AAGAGAGAGTAGGAGTAATACTGCGTAATTAGAACAGCTCACACAAATAAAGGGGTTTGATATTGGG<br>AGATGGCTGGAGGTTTATGTTAATAACTTGTGAATGAAATTAATGGCCCTAGAATAGAAGAAATTC<br>GGCCAGGTGAAGAGAGAAAAATGGTTAAATCTACGGAGGCCCTGCGTGTGCCAAATTACCGGACAAG<br>GGGGATATACGGTTCATCCTGTCCCGCACCAGCTTCTACACCAGATGAGGCCAATAAAGAAGGAA<br>AGAAGGGGGCAGGAGTCAAAAGCTTATATTATTTATCCGGGGGAAGGCCATGTCGGGAGCTCCGATCA<br>TTAAAGGAATTAATCAGTTGCCGAACCTCCAATTATAATTGGCATTACTATAAAGAAAATTATTACGAA<br>AGCATGTGCAGTTACAATTACGTTATAGATCTGGTCGTCTCCTAATAGGGAGCCTGGTTGACTTAATTCT<br>GCCCGAATGAGCAGACTTAAGGCCGTCCCTACTATTCCCGCCCAGGCACCAA                               |
| COI_13# | GTATTTAGGTTCCGATCTGTGAGAAGTATGGTGATTCTGCAGCTAGAACAGGAAGAGAGAGTAGAAG<br>TAATACTGCGTAATTAGTACAGCCACACAAATAAAGGGGTTTGATATTGAGAAATGGCTGGAGGTTT<br>CATGTTAATAATTGTTGTGATGAAATTAATGGCCCTAAGATGGAAGAAATTCCTGCCAGGTGAAGAGA                                                                                                                                                                                                                                                                                                                                                                                                                                                             |

|         |                                                                                                                                                                                                                                                                                                                                                                                                                                                                                                                                                                                         |
|---------|-----------------------------------------------------------------------------------------------------------------------------------------------------------------------------------------------------------------------------------------------------------------------------------------------------------------------------------------------------------------------------------------------------------------------------------------------------------------------------------------------------------------------------------------------------------------------------------------|
|         | GAAAAATGGTTAAGTCTACGGATGCCCCCTGCGTGTGCCAAATTACCTGACAAGGGGGGATATACGGTTC<br>ATCCTGTTCGGGCACCAGCTTCTACACCAGATGAAGCCAATAAAAGAAGGAAAGAAGGGGGCAGGAG<br>TCAAAAAGCTTATATTATTTATCCGAGGGAAGGCCATGTCTGGGGCTCCAATCATTAAAGGGATTAATCA<br>GTTGCCAAACCCCCCAATTATGATTGGCATTACTATAAGAAAATTATTACGAAAGCATGTGCAGTTAC<br>AATTACGTTATAAATCTGGTCGTCTCCTAATAGAGAGCCTGGTTGACTTAATTCTGCCCCG                                                                                                                                                                                                                        |
| COI_14# | TGTATTTAGGTTCCGATCTGTGAGAAGTTGGTGATTCTGCAGCTAGAACAGGAAGAGAGAGTAGAAG<br>TAATACTGCGGTAATTAGTACAGCCACACAAATAAAGGGGTTTGATATTGGGAAATGGCTGGAGGTTT<br>CATGTTAATAATTGTTGTGATGAAATTAATGGCCCTAAGATGGAAGAAATTCCTGCCAGGTGAAGAGA<br>GAAAAATGGTTAAGTCTACGGATGCCCCCTGCGTGTGCCAAATTACCTGACAAGGGGGGATATACGGTTC<br>ATCCTGTTCGGGCACCAGCTTCTACACCAGATGAGGCCAATAAAAGAAGGAAAGAAGGGGGCAGGAG<br>TCAAAAAGCTTATATTATTTATCCGGGGGAAGGCCATGTCTGGGGCTCCAATCATTAAAGGGATTAATCA<br>GTTGCCAAACCCCCCAATTATGATTGGCATTACTATAAGAAAATTATTACGAAAGCATGTGCAGTTAC<br>AATTACGTTATAAATCTGGTCGTCTCCTAATAGAGAGCCTGGTTGACTTAATTCTGCCCCG |
| COI_15# | CCTGCGGGGTCGAAGATGTTGTATTTAGGTTCCGATCTGTGAGAAGTATGGTGATTCTGCAGCTAGAA<br>CAGGAAGGGAGAGTAGAAGTAAACTGCGGTAATTAGTACAGCTCACACAAATAAGGGGGTTTGATA<br>TTGGGAAATGGCTGGGGGTTTCATGTTAATAATTGTTGTGATGAAATTAATGGCCCTAAGATGGAAGA<br>AATTCCTGCCAGGTGAAGAGAGAAAATGGTTAAGTCTACGGATGCCCCCTGCGTGTGCCAAATTCCTG<br>ACAAGGGAGGATATACGGTTCATCCTGTTCGGGCACCAGCTTCTACACCAGATGAAGCCAATAAAAGA<br>AGGAAAGAAGGGGGCAGGAGTCAAAAGCTTATATTATTTATCCGAGGGAAGGCCATGTCTGGGGCTCC<br>AATCATTAAAGGAATTAATCAGTTGCCAAACCCCCCAATTATGATTGGCATTACTATAAGAAAATTATT<br>ACGAAAGCATGTGCAGTTACAATTACGTTATAAATCTGGTCGTCTC                   |



**Table S3.** Estimates of Evolutionary Divergence between Sequences

|           | SY-medaka | Ocu   | Olu   | Ola   | Osi   | Oja   | Omi   | Oda   | Ome   | Oce   | Osa   | Oma   | Dre |
|-----------|-----------|-------|-------|-------|-------|-------|-------|-------|-------|-------|-------|-------|-----|
| SY-medaka |           |       |       |       |       |       |       |       |       |       |       |       |     |
| Ocu       | 0.005     |       |       |       |       |       |       |       |       |       |       |       |     |
| Olu       | 0.095     | 0.094 |       |       |       |       |       |       |       |       |       |       |     |
| Ola       | 0.135     | 0.135 | 0.144 |       |       |       |       |       |       |       |       |       |     |
| Osi       | 0.137     | 0.137 | 0.145 | 0.107 |       |       |       |       |       |       |       |       |     |
| Oja       | 0.184     | 0.185 | 0.191 | 0.186 | 0.188 |       |       |       |       |       |       |       |     |
| Omi       | 0.204     | 0.204 | 0.214 | 0.205 | 0.206 | 0.187 |       |       |       |       |       |       |     |
| Oda       | 0.187     | 0.186 | 0.200 | 0.191 | 0.187 | 0.169 | 0.181 |       |       |       |       |       |     |
| Ome       | 0.185     | 0.185 | 0.200 | 0.189 | 0.187 | 0.169 | 0.180 | 0.010 |       |       |       |       |     |
| Oce       | 0.189     | 0.189 | 0.199 | 0.192 | 0.188 | 0.195 | 0.199 | 0.184 | 0.184 |       |       |       |     |
| Osa       | 0.192     | 0.191 | 0.198 | 0.194 | 0.189 | 0.199 | 0.208 | 0.193 | 0.193 | 0.096 |       |       |     |
| Oma       | 0.188     | 0.187 | 0.196 | 0.191 | 0.188 | 0.198 | 0.204 | 0.190 | 0.189 | 0.093 | 0.070 |       |     |
| Dre       | 0.266     | 0.265 | 0.272 | 0.272 | 0.267 | 0.275 | 0.272 | 0.267 | 0.267 | 0.263 | 0.266 | 0.263 |     |

*Ocu*, *O. curvinotus*; *Olu*, *O. luzonensis*; *Ola*, *O. latipes*; *Osi*, *O. sinensis*; *Oja*, *O. javanicus*; *Omi*, *O. minutillus*; *Oda*, *O. dancena*; *Ome*, *O. melastigma*; *Oce*, *O. Celebensis*; *Osa*, *O. sarasinorum*; *Oma*, *O. marmoratus*; *Dre*, *D. rerio*. The mitochondrial sequences ID of those fish are shown in Figure. 1B.

**Table S4.** Summary statistics of testes and ovaries transcriptome data of *O. curvinotus*

| Sample             | ovary_SY1 | ovary_SY2 | ovary_SY3 | testis_SY1 | testis_SY2 | testis_SY3 |
|--------------------|-----------|-----------|-----------|------------|------------|------------|
| Raw Reads(M)       | 63.23     | 62.86     | 63.15     | 62.85      | 63.53      | 63.27      |
| Clean Reads(M)     | 61.01     | 60.92     | 61.14     | 61.2       | 61.59      | 61.08      |
| Clean Reads Q20(%) | 98.35     | 98.53     | 98.38     | 98.57      | 98.68      | 98.39      |
| Clean Reads Q30(%) | 94.25     | 95.06     | 94.21     | 95.03      | 95.41      | 94.25      |
| GC content (%)     | 49.23     | 49.03     | 48.89     | 49.16      | 48.32      | 49.01      |
| Transcripts number | 64,959    | 66,276    | 72,248    | 75,928     | 98,055     | 87,829     |
| Unigenes number    | 49,135    | 49,232    | 52,952    | 55,270     | 61,902     | 60,810     |

**Table S5.** *O. curvinitus* transcriptome reference assembly and annotation statistics

| Database               | Number     | Percentage (%) |
|------------------------|------------|----------------|
| <b>Assembly</b>        |            |                |
| Total base (bp)        | 94,333,707 |                |
| Number of unigenes     | 84,484     |                |
| Average length (bp)    | 1,116      |                |
| N50 (bp)               | 2,384      |                |
| GC content             |            | 48.67          |
| <b>Annotation</b>      |            |                |
| Annotated in NR        | 46,377     | 54.89          |
| Annotated in NT        | 78,492     | 92.91          |
| Annotated in KEGG      | 37,636     | 44.55          |
| Annotated in SwissProt | 37,843     | 44.79          |
| Annotated in KOG       | 33,324     | 39.44          |
| Annotated in GO        | 10,221     | 12.10          |
| Overall                | 79,298     | 93.87          |

**Table S6.** The expression patterns of some DEGs related to gonad development and reproduction

| Gene          | Gene annotation                                                       | Probabilit | Nr ID         | log2FC(ovary/testi |
|---------------|-----------------------------------------------------------------------|------------|---------------|--------------------|
| <i>wnt17b</i> | wingless-type MMTV integration site family, member 7B                 | 1          | XP_020569989. | -7.39518           |
| <i>wnt4b</i>  | wingless-type MMTV integration site family member 4b                  | 1          | NP_001153912. | -8.82761           |
| <i>wnt2</i>   | wingless-type MMTV integration site family member 2                   | 0.999605   | XP_020492875. | -7.49185           |
| <i>trd7b</i>  | Tudor domain-containing protein 7B                                    | 0.999051   | XP_004079778. | -2.67008           |
| <i>theg</i>   | Testicular haploid expressed gene protein                             | 0.999995   | XP_020569141. | -6.79008           |
| <i>tdr15</i>  | Tudor domain-containing protein 15                                    | 1          | XP_018550215. | -3.03149           |
| <i>star9</i>  | StAR-related lipid transfer protein 9                                 | 0.998506   | XP_020569428. | -2.44163           |
| <i>spef2</i>  | Sperm flagellar protein 2                                             | 1          | XP_020561437. | -8.77329           |
| <i>spef1</i>  | Sperm flagellar protein 1                                             | 1          | XP_004077227. | -5.21739           |
| <i>spc11</i>  | Speriolin-like protein                                                | 1          | XP_020565798. | -14.1918           |
| <i>spat7</i>  | Spermatogenesis-associated protein 7                                  | 0.999657   | XP_011488521. | -2.11963           |
| <i>sox9</i>   | SRY (sex determining region Y)-box 9                                  | 1          | BAH05019.1    | -4.37676           |
| <i>smc1b</i>  | Structural maintenance of chromosomes protein 1B                      | 1          | XP_017285706. | -8.81513           |
| <i>smc3</i>   | structural maintenance of chromosomes protein 3                       | 0.99944643 | XP_004066378. | -2.00674226        |
| <i>rec8</i>   | Meiotic recombination protein REC8 homolog                            | 1          | XP_004081264. | -5.22288           |
| <i>r3hd4</i>  | R3H domain-containing protein 4                                       | 0.999294   | XP_004068025. | -7.89785           |
| <i>pol5</i>   | Retrovirus-related Pol polyprotein from transposon opus               | 0.999049   | XP_008293872. | -3.43296           |
| <i>pol4</i>   | Retrovirus-related Pol polyprotein from transposon 412                | 0.995518   | XP_019221790. | -3.55639           |
| <i>pol3</i>   | Retrovirus-related Pol polyprotein from transposon 17.6               | 0.993254   | XP_008283279. | -2.49442           |
| <i>pk3cb</i>  | Phosphatidylinositol 4,5-bisphosphate 3-kinase catalytic subunit beta | 0.982855   | XP_011481352. | -2.70834           |
| <i>mlf1</i>   | Myeloid leukemia factor 1                                             | 1          | XP_011481028. | -8.19251           |
| <i>kat7</i>   | Histone acetyltransferase KAT7                                        | 1          | XP_020561190. | -5.26325           |
| <i>kat5</i>   | Histone acetyltransferase KAT5                                        | 0.998634   | XP_011481726. | -3.41885           |
| <i>kapca</i>  | cAMP-dependent protein kinase catalytic subunit alpha                 | 0.999524   | XP_008434985. | -5.11088           |
| <i>izumo1</i> | Izumo sperm-egg fusion protein 1                                      | 1          | XP_020561433. | -8.92296           |
| <i>itpr3</i>  | Inositol 1,4,5-trisphosphate receptor type 3                          | 0.998897   | XP_020557263. | -4.1838            |
| <i>itpr1</i>  | Inositol 1,4,5-trisphosphate receptor type 1                          | 0.986726   | XP_020559132. | -2.36535           |
| <i>hsp70</i>  | Heat shock cognate 70 kDa protein                                     | 0.999753   | NP_001098385. | -7.06286           |
| <i>hsd17b</i> | hydroxysteroid 17-beta dehydrogenase 7                                | 0.998642   | XP_017280664. | -4.72247           |
| <i>hs90a</i>  | Heat shock protein HSP 90-alpha                                       | 0.998449   | XP_004083819. | -2.81199           |
| <i>hdac8</i>  | Histone deacetylase 8                                                 | 0.999995   | XP_011485972. | -2.53244           |
| <i>hdac7</i>  | Histone deacetylase 7                                                 | 0.999047   | XP_011473874. | -2.90754           |
| <i>hdac3</i>  | Histone deacetylase 3                                                 | 1          | XP_004073599. | -2.75168           |
| <i>gtd2b</i>  | General transcription factor II-I repeat domain-containing protein 2B | 1          | XP_004077286. | -9.38298           |
| <i>gsdf</i>   | gonadal soma derived factor                                           | 0.999904   | NP_001171213. | -2.92127           |
| <i>gphb5</i>  | Glycoprotein hormone beta-5                                           | 0.998848   | XP_020567290. | -7.88874           |
| <i>gnrr2</i>  | gonadotropin-releasing hormone receptor 2                             | 1          | NP_001098392. | -9.34725           |
| <i>gnaq</i>   | Guanine nucleotide-binding protein G(q) subunit alpha                 | 0.99888    | XP_020556761. | -2.18813           |
| <i>gna14</i>  | Guanine nucleotide-binding protein subunit alpha-14                   | 0.998538   | XP_004074607. | -2.21025           |
| <i>gin1</i>   | Gypsy retrotransposon integrase-like protein 1                        | 0.996027   | XP_016415952. | -4.12928           |
| <i>gata5</i>  | Transcription factor GATA-5                                           | 0.998401   | XP_011475114. | -3.54386           |
| <i>fgfr3</i>  | Fibroblast growth factor receptor 3                                   | 0.995207   | XP_004082745. | -2.50714           |
| <i>dmrt1</i>  | Doublesex- and mab-3-related transcription factor 1                   | 1          | AA591465.1    | -9.7535            |
| <i>dhcr7</i>  | 7-dehydrocholesterol reductase                                        | 0.998121   | XP_022071062. | -2.6881            |
| <i>dhc24</i>  | Delta(24)-sterol reductase                                            | 1          | XP_018525864. | -8.27922           |
| <i>dh12b</i>  | Very-long-chain 3-oxoacyl-CoA reductase-B                             | 0.982641   | XP_011485867. | -2.36457           |
| <i>cpeb4</i>  | Cytoplasmic polyadenylation element-binding protein 4                 | 0.999635   | XP_011481506. | -4.70769           |
| <i>cp4b1</i>  | cytochrome P450 4B1-like                                              | 0.999993   | XP_004078318. | -6.35814           |
| <i>cp26b</i>  | cytochrome P450, family 26, subfamily B                               | 0.998745   | NP_001265750. | -5.564             |
| <i>cp11b</i>  | cytochrome P450 11beta                                                | 1          | NP_001098570. | -7.91754           |
| <i>cfa70</i>  | Cilia- and flagella-associated protein 70                             | 1          | XP_020567678. | -8.26835           |
| <i>cfa54</i>  | Cilia- and flagella-associated protein 54                             | 0.99999    | XP_020564512. | -6.77196           |
| <i>cb5d1</i>  | cytochrome b5 domain-containing protein 1                             | 1          | XP_004086762. | -7.56122           |
| <i>amh</i>    | anti-Mullerian hormone                                                | 0.984112   | NP_001098198. | -1.0285            |
| <i>akt3</i>   | RAC-gamma serine/threonine-protein kinase                             | 0.999764   | XP_007570539. | -3.84082           |
| <i>zp4</i>    | ona pellucida sperm-binding protein 4                                 | 1          | XP_011472723. | 4.20555243         |
| <i>zp3</i>    | ona pellucida sperm-binding protein 3                                 | 1          | XP_011488823. | 12.42472542        |
| <i>zp1</i>    | ona pellucida sperm-binding protein 1                                 | 1          | XP_004071858. | 4.428162622        |
| <i>zglp1</i>  | zinc finger, GATA-like protein 1                                      | 1          | XP_004065851. | 7.585234067        |

|               |                                                        |            |               |             |
|---------------|--------------------------------------------------------|------------|---------------|-------------|
| <i>zar1</i>   | Zygote arrest protein 1                                | 1          | XP_004067611. | 9.217390254 |
| <i>wnt9b</i>  | wingless-type MMTV integration site family, member 9B  | 0.99999958 | XP_020560833. | 7.686500527 |
| <i>wnt9a</i>  | wingless-type MMTV integration site family member 9a   | 0.99698495 | XP_004079455. | 4.041963293 |
| <i>wnt5b</i>  | wingless-type MMTV integration site family, member 5B  | 0.99752726 | XP_011489302. | 3.348832279 |
| <i>wnt5a</i>  | wingless-type MMTV integration site family, member 5A  | 0.99941565 | XP_022059770. | 4.371022644 |
| <i>wnt4a</i>  | wingless-type MMTV integration site family member 4a   | 0.99840374 | NP_001153911. | 2.032069901 |
| <i>wnt16</i>  | wingless-type MMTV integration site family, member 16  | 0.99881709 | XP_020557844. | 5.32309109  |
| <i>wnt2bb</i> | wingless-type MMTV integration site family, member 2Bb | 0.99158103 | XP_011475046. | 2.704871964 |
| <i>wif1</i>   | Wnt inhibitory factor 1                                | 0.99970288 | XP_020558359. | 5.764871591 |
| <i>tf7l2</i>  | Transcription factor 7-like 2                          | 0.99546189 | XP_022046618. | 2.036951136 |
| <i>tesk1</i>  | Dual specificity testis-specific protein kinase 1      | 0.99980362 | XP_011487062. | 2.161067814 |
| <i>sx17a</i>  | SRY (sex determining region Y)-box 17                  | 0.99785707 | NP_001158345. | 2.515945327 |
| <i>strbp</i>  | Spermatid perinuclear RNA-binding protein              | 0.99693893 | XP_018525986. | 2.205448658 |
| <i>spat1</i>  | Spermatogenesis-associated protein 1                   | 0.99378780 | XP_011472245. | 2.683194338 |
| <i>sp130</i>  | Histone deacetylase complex subunit SAP130             | 1          | XP_011472693. | 3.005244672 |
| <i>sox7</i>   | SRY (sex determining region Y)-box 7                   | 0.99889622 | XP_011490013. | 2.484079144 |
| <i>sox10</i>  | SRY (sex determining region Y)-box 10                  | 0.99951725 | NP_001158343. | 5.294620749 |
| <i>sox6</i>   | SRY (sex determining region Y)-box 6                   | 0.94845405 | XP_019213816. | 1.131911676 |
| <i>sox17</i>  | SRY (sex determining region Y)-box 17                  | 0.96333333 | NP_001158345. | 2.515945327 |
| <i>sx18a</i>  | SRY (sex determining region Y)-box 18                  | 0.92435533 | XP_011475950. | 1.071622928 |
| <i>sox5</i>   | SRY (sex determining region Y)-box 5                   | 0.98125103 | BAO57768.1    | 1.413397141 |
| <i>sox4</i>   | SRY (sex determining region Y)-box 4                   | 0.99488196 | XP_020555578. | 1.876193798 |
| <i>rspo3</i>  | R-spondin-3                                            | 0.99966952 | XP_015250864. | 6.942514505 |
| <i>rarga</i>  | Retinoic acid receptor gamma-A                         | 0.99748218 | XP_004069175. | 4.611024797 |
| <i>pthd1</i>  | Patched domain-containing protein 1                    | 0.99858132 | XP_011487428. | 4.442943496 |
| <i>ptc1</i>   | Protein patched homolog 1                              | 0.99540125 | XP_011485123. | 2.329214449 |
| <i>nr6a1</i>  | Nuclear receptor subfamily 6 group A member 1-A        | 0.99977779 | XP_007557810. | 4.218834602 |
| <i>nr5a2</i>  | Nuclear receptor subfamily 5 group A member 2          | 1          | NP_001098298. | 3.715420433 |
| <i>nr4a1</i>  | Nuclear receptor subfamily 4 group A member 1          | 1          | XP_004070930. | 5.448553828 |
| <i>nr2f6</i>  | Nuclear receptor subfamily 2 group F member 6          | 0.99965987 | XP_004078947. | 2.972767361 |
| <i>nr1d2</i>  | Nuclear receptor subfamily 1 group D member 2          | 0.99849059 | XP_011492490. | 2.150889227 |
| <i>nanos3</i> | Nanos homolog 3                                        | 0.99946184 | NP_001116300. | 4.778718695 |
| <i>lef1</i>   | Lymphoid enhancer-binding factor 1                     | 0.99665026 | XP_011474499. | 4.026472211 |
| <i>kdm6b</i>  | lysine-specific demethylase 6B-like                    | 0.99881383 | XP_011482001. | 2.468659977 |
| <i>kdm6a</i>  | lysine-specific demethylase 6A isoform X1              | 1          | XP_020568543. | 2.953526973 |
| <i>kat6b</i>  | Histone acetyltransferase KAT6B                        | 0.99368946 | XP_020561845. | 3.36923381  |
| <i>hdac7</i>  | Histone deacetylase 7                                  | 0.99737741 | XP_004070312. | 2.523867903 |
| <i>hdac4</i>  | Histone deacetylase 4                                  | 0.99794789 | XP_011488255. | 2.327989848 |
| <i>gper1</i>  | androgen receptor alpha                                | 0.98747173 | XP_004071380. | 2.266786541 |
| <i>gon3</i>   | Progonadoliberin-3                                     | 0.99864504 | NP_001098142. | 8.537747862 |
| <i>gnrr1</i>  | gonadotropin-releasing hormone receptor 1              | 0.99488797 | NP_001098352. | 3.101719921 |
| <i>gdf9</i>   | Growth/differentiation factor 9                        | 1          | XP_004073386. | 4.092295995 |
| <i>fzd9</i>   | Frizzled-9                                             | 0.99999877 | XP_004075813. | 3.723658827 |
| <i>fzd7</i>   | Frizzled-7                                             | 0.99142416 | XP_018521153. | 2.060473859 |
| <i>fxp1b</i>  | Forkhead box protein P1-B                              | 0.99511063 | XP_020558754. | 2.643653692 |
| <i>fstl4</i>  | Follistatin-related protein 4                          | 0.99974672 | XP_022046629. | 6.242493627 |
| <i>foxl2</i>  | Forkhead box protein L2                                | 1          | BAH05020.1    | 10.0247703  |
| <i>foxk2</i>  | Forkhead box protein K2                                | 1          | XP_004080716. | 3.740955396 |
| <i>foxh1</i>  | Forkhead box protein H1                                | 0.99984307 | NP_001153943. | 3.971122923 |
| <i>foxf1</i>  | Forkhead box protein F1                                | 0.99117670 | XP_004067264. | 2.300917602 |
| <i>figla</i>  | factor in the germline alpha isoform X1                | 1          | XP_011477803. | 5.814649649 |
| <i>fgfr2</i>  | Fibroblast growth factor receptor 2                    | 0.99472363 | XP_011483053. | 2.046820857 |
| <i>fgfr1a</i> | Fibroblast growth factor receptor 1-A                  | 0.99999999 | BAF49180.1    | 2.187471297 |
| <i>fgf3</i>   | Fibroblast growth factor 3                             | 0.99945322 | XP_011485317. | 5.856066337 |
| <i>fgf16</i>  | Fibroblast growth factor 16                            | 0.99945682 | XP_004073393. | 4.962267353 |
| <i>fgf13</i>  | Fibroblast growth factor 13                            | 0.99511659 | XP_011478253. | 3.532269607 |
| <i>fgf12</i>  | Fibroblast growth factor 12                            | 0.99952503 | XP_020556550. | 3.398233681 |
| <i>dvl1</i>   | Segment polarity protein dishevelled homolog DVL-1     | 0.99968349 | XP_008276717. | 2.612405897 |
| <i>dhbp7</i>  | 5.6e-122/3-keto-steroid reductase                      | 0.99951301 | XP_004068242. | 2.63599101  |
| <i>cp3ar</i>  | Cytochrome P450 3A27                                   | 0.99999997 | XP_004077330. | 2.413655224 |
| <i>cp2k1</i>  | Cytochrome P450 2K1                                    | 0.99999999 | AGN04293.1    | 3.747955999 |

|               |                                             |            |               |             |
|---------------|---------------------------------------------|------------|---------------|-------------|
| <i>cp26a</i>  | cytochrome P450, family 26, subfamily A,    | 1          | NP_001265772. | 6.845619377 |
| <i>cp24a</i>  | 1,25-dihydroxyvitamin D(3) 24-hydroxylase   | 1          | XP_020558883. | 6.074992301 |
| <i>cp19b</i>  | cytochrome P450 19b                         | 0.99949942 | XP_020559313. | 5.466978428 |
| <i>cp19a</i>  | cytochrome P450 19A1-like                   | 1          | NP_001265808. | 11.51191734 |
| <i>cp191b</i> | cytochrome P450 19b                         | 0.99949942 | XP_020559313. | 5.466978428 |
| <i>bmr1b</i>  | Bone morphogenetic protein receptor type-1B | 0.99766148 | XP_020561516. | 2.259910442 |
| <i>bmp7</i>   | Bone morphogenetic protein 7                | 0.99809437 | XP_004070841. | 2.184590389 |
| <i>bmp15</i>  | Bone morphogenetic protein 15               | 1          | XP_004079992. | 10.84999144 |
| <i>arb</i>    | androgen receptor beta subtype              | 1          | BAI58984.1    | 4.132855278 |
| <i>ara</i>    | Androgen receptor alpha                     | 0.99958649 | AHF58586.1    | 3.936856017 |
